# Supplementary material
Source: PubMed Central journal article supplement (PMC6109918)
Supplement: supp_RA118.001927_135323_1_supp_150985_pb3l6g.pdf [file supp_RA118.001927_135323_1_supp_150985_pb3l6g.pdf]

**Transcriptional dynamics during lens fiber cell differentiation and novel insights into the denucleation process**

Saima Limi<sup>1</sup>, Adrien Senecal<sup>2</sup>, Robert Coleman<sup>2</sup>, Melissa Lopez-Jones<sup>2</sup>, Peng Guo<sup>2</sup>, Christina Polumbo<sup>2</sup>, Robert H. Singer<sup>2,3,4</sup>, Arthur I. Skoultchi<sup>3</sup>, Ales Cvekl<sup>1,5\*</sup>

**Materials Included:**

Figures S1 to S7 and Tables S1-S2

**Fig. S1. Chromosomal localization, probe design, and stages of lens fiber cell differentiation.** A) Chromosomal localization of genes on three mouse chromosomes: 1 ( $\gamma$ A-Crystallin), 5 ( $\beta$ B1-Crystallin and  $\beta$ -actin), and 17 ( $\alpha$ A-Crystallin). Genes examined and their neighbors are shown in red and black boxes, respectively. B) A summary of probes and their dyes used in this study.

**Fig. S1A**

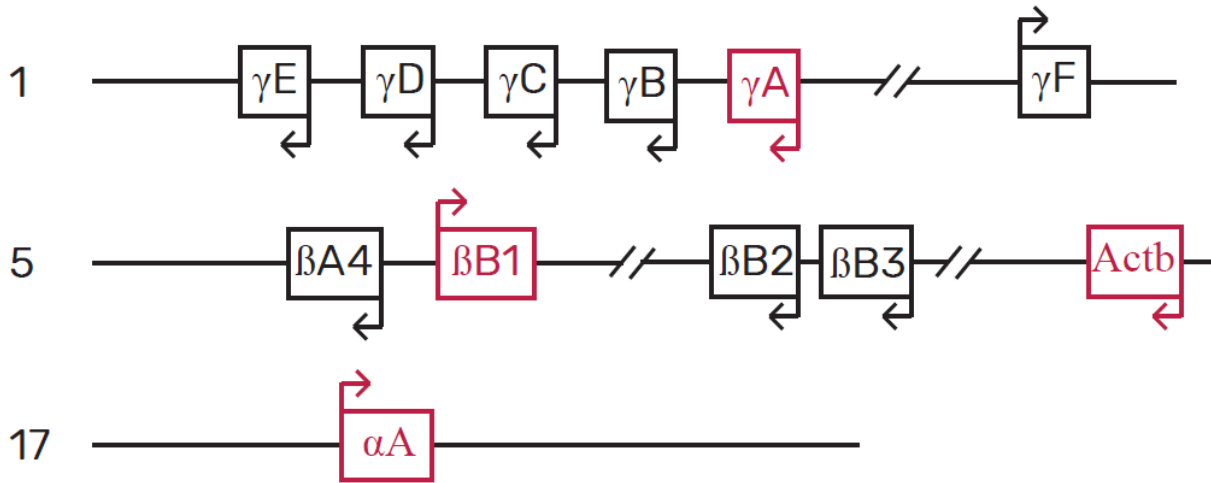

**Fig. S1B**

| Gene                  | Probe length | Exon or Intron | Dye                | # of probes |
|-----------------------|--------------|----------------|--------------------|-------------|
| $\alpha$ A-Crystallin | 20           | Exon           | Quasar 570         | 25          |
| $\alpha$ A-Crystallin | 20           | Intron         | Quasar 670         | 21          |
| $\gamma$ A-Crystallin | 20           | Exon           | Quasar 670         | 16          |
| $\beta$ B1-Crystallin | 20           | Exon           | CAL Fluore Red 610 | 12          |
| $\beta$ -actin        | 20           | Exon           | Quasar 670         | 35          |

**Fig. S2. RNA FISH of  $\alpha$ A-crystallin introns and exons to identify and confirm nascent transcription sites in cell nuclei of newborn mouse lens tissue. Exons and introns were detected by Quasar 570- and Quasar 670-labeled probes (see Fig. S1B), respectively.**

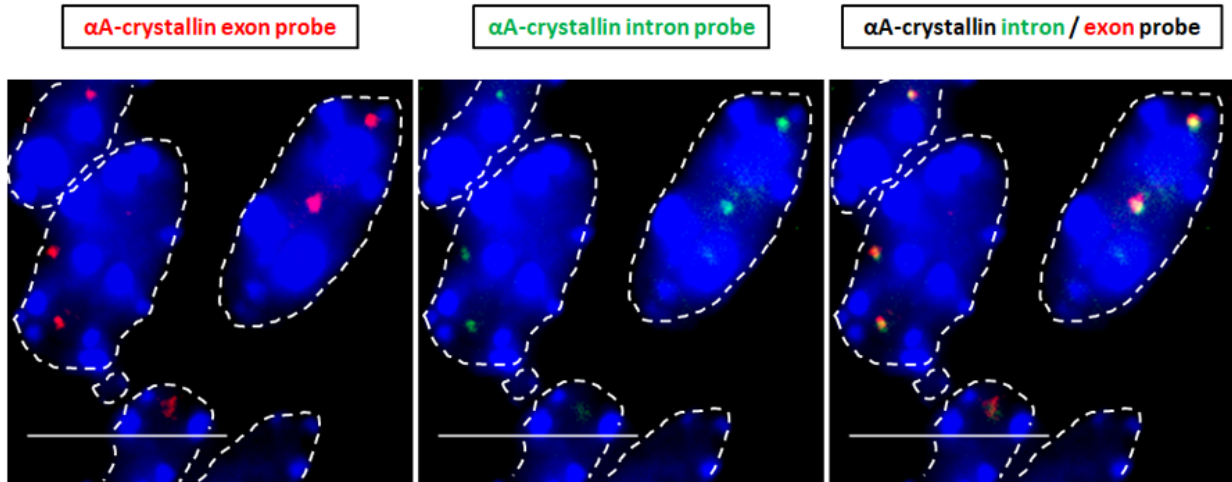

**Fig. S3. Co-localization of active RNA PolII and the transcription sites of  $\beta$ -actin gene to confirm that RNA FISH technique detects nascent transcription sites.** The co-localization shows  $\beta$ -actin by RNA FISH (red) and RNA polymerase II (green) by immunofluorescence in newborn mouse lens fiber cell nuclei. RNA FISH signal were detected by various Quasar or CAL Fluor dyes indicated in Fig. S1B and RNA polymerase II signal was detected by Alexa-Fluor 488 conjugated secondary antibody against an anti-Pol II primary antibody.

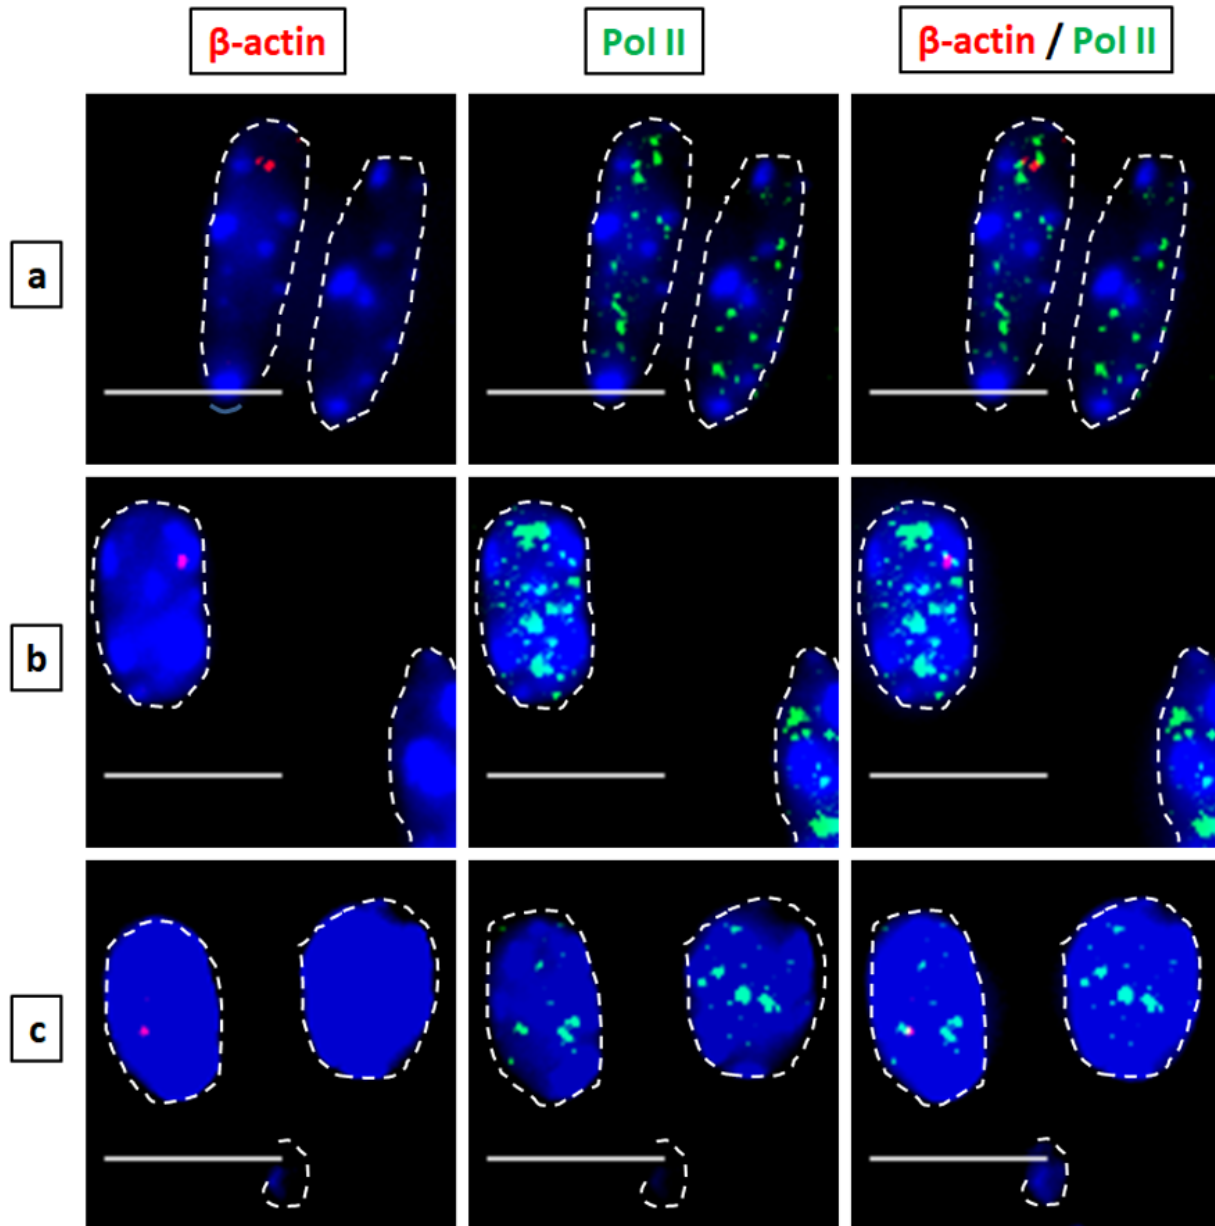

**Fig. S4. Co-localization of active RNA PolII and the transcription sites of  $\alpha$ A-crystallin gene to confirm that RNA FISH technique detects nascent transcription sites.** The co-localization shows  $\alpha$ A-crystallin by RNA FISH (red) and RNA polymerase II (green) by immunofluorescence in newborn mouse lens fiber cell nuclei. RNA FISH signal were detected by various Quasar or CAL Fluor dyes indicated in Fig. S1B and RNA polymerase II signal was detected by Alexa-Fluor 488 conjugated secondary antibody against an anti-Pol II primary antibody.

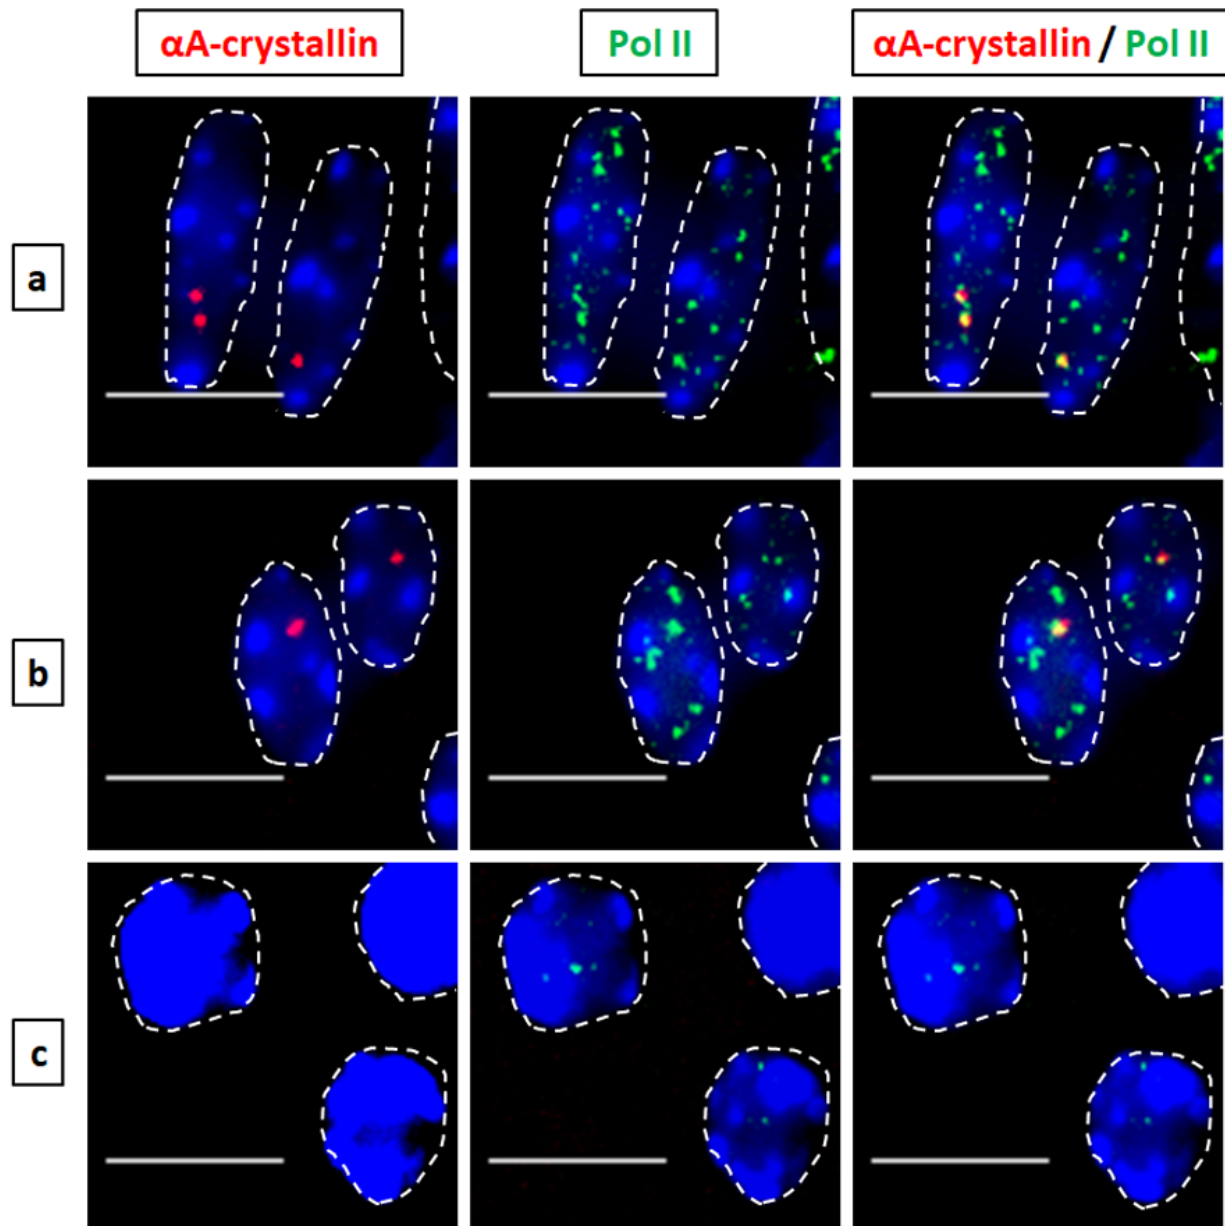

**Fig. S5. Co-localization of active RNA PolII and the transcription sites of  $\beta$ B1-crystallin gene to confirm that RNA FISH technique detects nascent transcription sites.** The co-localization shows  $\beta$ B1-crystallin by RNA FISH (red) and RNA polymerase II (green) by immunofluorescence in newborn mouse lens fiber cell nuclei. RNA FISH signal were detected by various Quasar or CAL Fluor dyes indicated in Fig. S1B and RNA polymerase II signal was detected by Alexa-Fluor 488 conjugated secondary antibody against an anti-Pol II primary antibody.

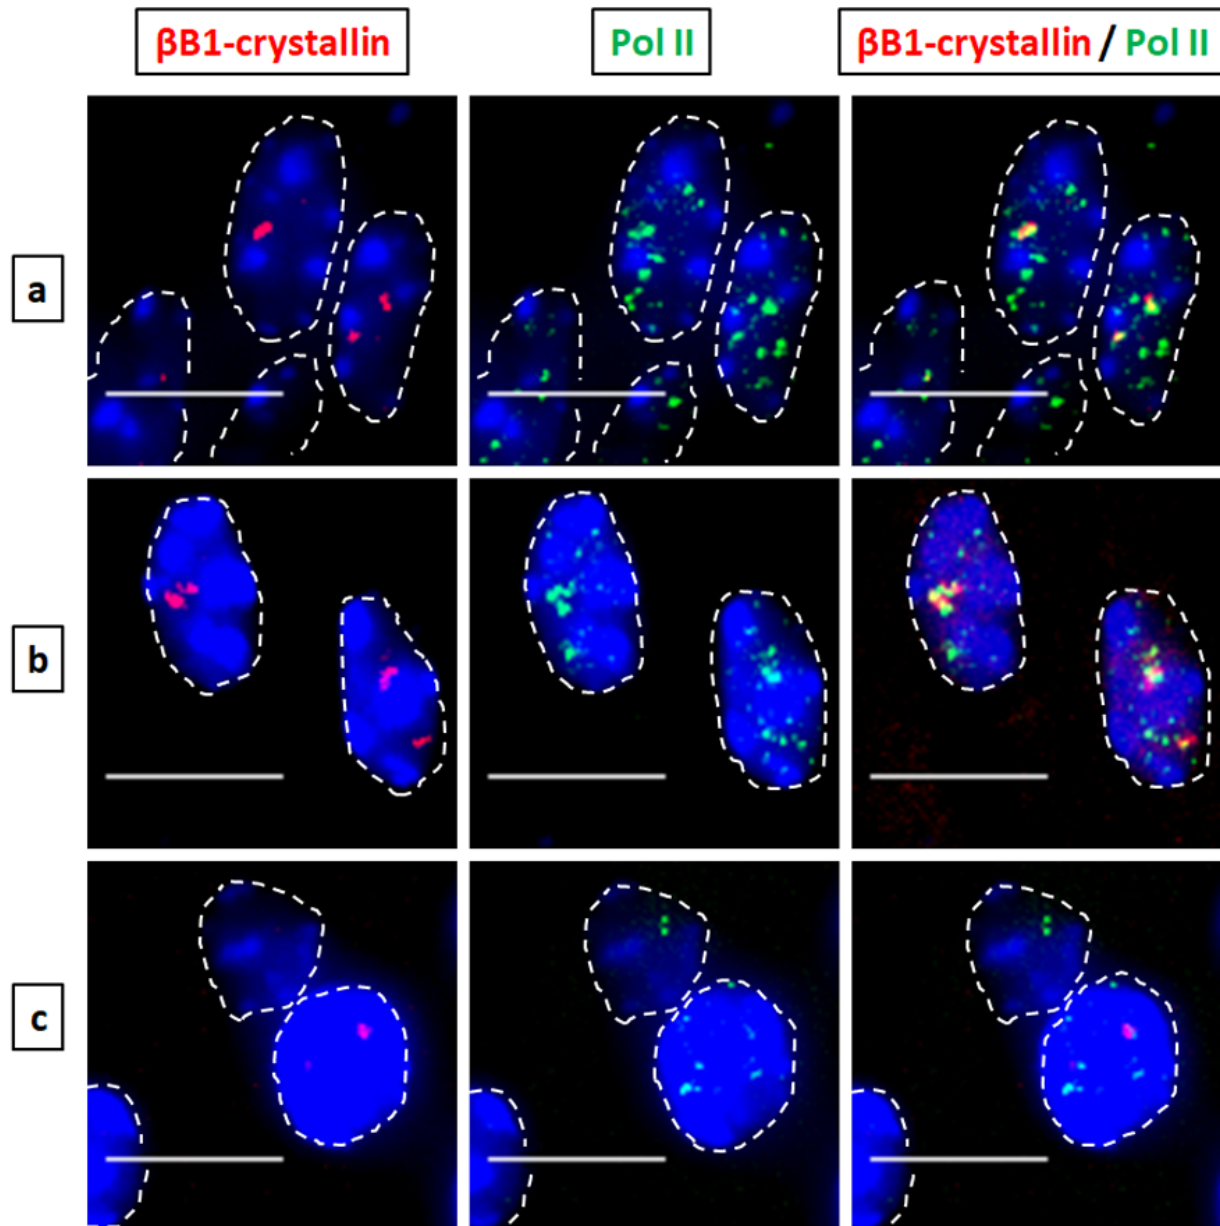

**Fig. S6. Co-localization of active RNA PolII and the transcription sites of  $\gamma$ A-crystallin gene to confirm that RNA FISH technique detects nascent transcription sites.** The co-localization shows  $\gamma$ A-crystallin by RNA FISH (red) and RNA polymerase II (green) by immunofluorescence in newborn mouse lens fiber cell nuclei. RNA FISH signal were detected by various Quasar or CAL Fluor dyes indicated in Fig. S1B and RNA polymerase II signal was detected by Alexa-Fluor 488 conjugated secondary antibody against an anti-Pol II primary antibody.

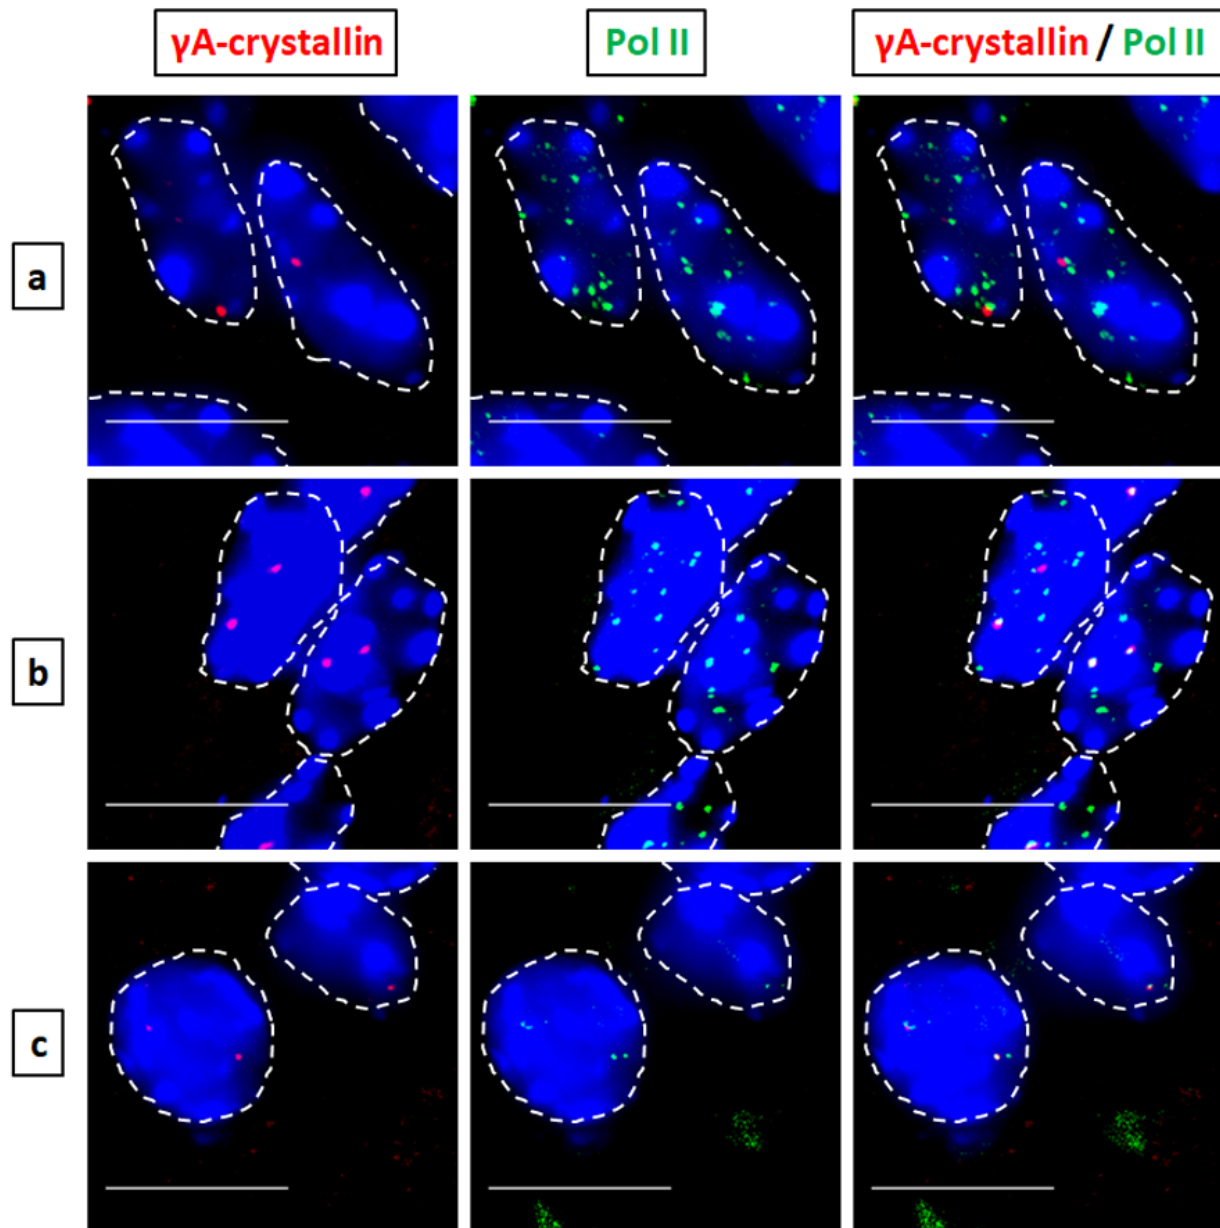

**Fig. S7. RNA FISH in newborn mouse lens epithelium shows that  $\beta$ B1- and  $\gamma$ A-crystallin shows no expression within the lens epithelium.** The various indicated genes were detected by Quasar and CAL Fluor dyes indicated in figure S1B.

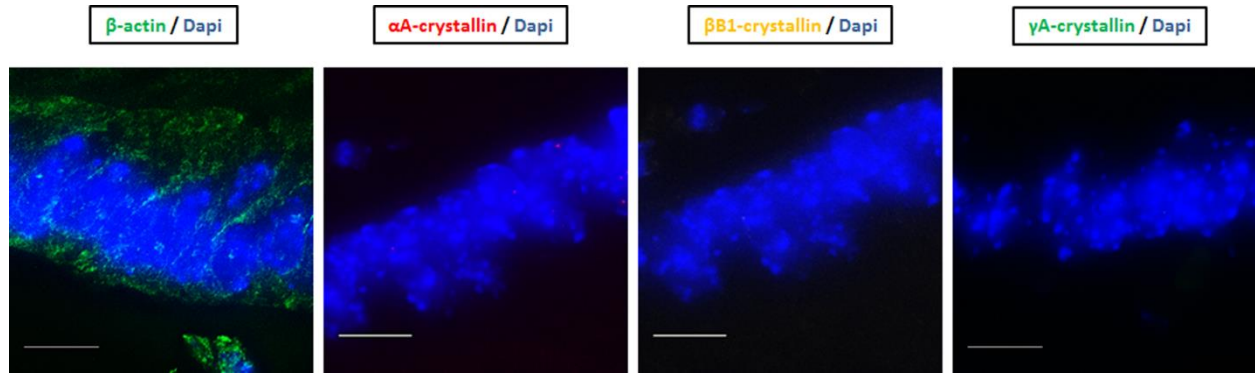



**Table. S1.** Number of cells counted at each of the four developmental stages, E12.5, E14.5, E16.5 and P1, from each of the four areas ‘a’, ‘b’, ‘c’, ‘d’, for each for the four genes studied,  $\beta$ -actin,  $\alpha$ A-,  $\beta$ B1- and  $\gamma$ A-crystallin.

| <b>E12.5</b>                           | <b>a</b> | <b>b</b> | <b>c</b> | <b>d</b> |
|----------------------------------------|----------|----------|----------|----------|
| <b><math>\beta</math>-actin</b>        | 145      | 132      | 152      | 138      |
| <b><math>\alpha</math>A-crystallin</b> | 293      | 267      | 301      | 276      |
| <b><math>\beta</math>B1-crystallin</b> | 109      | 116      | 147      | 162      |
| <b><math>\gamma</math>A-crystallin</b> | 148      | 135      | 149      | 138      |

| <b>E14.5</b>                           | <b>a</b> | <b>b</b> | <b>c</b> | <b>d</b> |
|----------------------------------------|----------|----------|----------|----------|
| <b><math>\beta</math>-actin</b>        | 195      | 92       | 82       | 185      |
| <b><math>\alpha</math>A-crystallin</b> | 306      | 222      | 159      | 259      |
| <b><math>\beta</math>B1-crystallin</b> | 194      | 113      | 91       | 70       |
| <b><math>\gamma</math>A-crystallin</b> | 112      | 109      | 68       | 189      |

| <b>E16.5</b>                           | <b>a</b> | <b>b</b> | <b>c</b> | <b>d</b> |
|----------------------------------------|----------|----------|----------|----------|
| <b><math>\beta</math>-actin</b>        | 229      | 140      | 107      | 111      |
| <b><math>\alpha</math>A-crystallin</b> | 340      | 219      | 177      | 108      |
| <b><math>\beta</math>B1-crystallin</b> | 207      | 158      | 116      | 80       |
| <b><math>\gamma</math>A-crystallin</b> | 272      | 133      | 106      | 125      |

| <b>P1</b>                              | <b>a</b> | <b>b</b> | <b>c</b> | <b>d</b> |
|----------------------------------------|----------|----------|----------|----------|
| <b><math>\beta</math>-actin</b>        | 559      | 329      | 211      | 0        |
| <b><math>\alpha</math>A-crystallin</b> | 750      | 434      | 214      | 0        |
| <b><math>\beta</math>B1-crystallin</b> | 381      | 211      | 114      | 0        |
| <b><math>\gamma</math>A-crystallin</b> | 326      | 246      | 162      | 0        |

|                                        | <b>WT P1</b> | <b>Snf2h null P1</b> |
|----------------------------------------|--------------|----------------------|
| <b><math>\beta</math>-actin</b>        | 901          | 540                  |
| <b><math>\alpha</math>A-crystallin</b> | 1319         | 717                  |
| <b><math>\beta</math>B1-crystallin</b> | 794          | 534                  |
| <b><math>\gamma</math>A-crystallin</b> | 805          | 504                  |

**Table. S2.** Number of transcription sites counted at each of the four developmental stages, E12.5, E14.5, E16.5 and P1, from each of the four areas ‘a’, ‘b’, ‘c’, ‘d’, for each for the four genes studied,  $\beta$ -actin,  $\alpha$ A-,  $\beta$ B1- and  $\gamma$ A-crystallin.

| <b>E12.5</b>                           | <b>a</b> | <b>b</b> | <b>c</b> | <b>d</b> |
|----------------------------------------|----------|----------|----------|----------|
| <b><math>\beta</math>-actin</b>        | 50       | 50       | 80       | 73       |
| <b><math>\alpha</math>A-crystallin</b> | 100      | 198      | 285      | 203      |
| <b><math>\beta</math>B1-crystallin</b> | 23       | 67       | 86       | 58       |
| <b><math>\gamma</math>A-crystallin</b> | 4        | 8        | 11       | 8        |

| <b>E14.5</b>                           | <b>a</b> | <b>b</b> | <b>c</b> | <b>d</b> |
|----------------------------------------|----------|----------|----------|----------|
| <b><math>\beta</math>-actin</b>        | 71       | 73       | 68       | 97       |
| <b><math>\alpha</math>A-crystallin</b> | 226      | 289      | 173      | 372      |
| <b><math>\beta</math>B1-crystallin</b> | 112      | 108      | 84       | 58       |
| <b><math>\gamma</math>A-crystallin</b> | 26       | 110      | 95       | 241      |

| <b>E16.5</b>                           | <b>a</b> | <b>b</b> | <b>c</b> | <b>d</b> |
|----------------------------------------|----------|----------|----------|----------|
| <b><math>\beta</math>-actin</b>        | 203      | 110      | 68       | 51       |
| <b><math>\alpha</math>A-crystallin</b> | 448      | 272      | 139      | 13       |
| <b><math>\beta</math>B1-crystallin</b> | 128      | 157      | 93       | 41       |
| <b><math>\gamma</math>A-crystallin</b> | 76       | 115      | 83       | 112      |

| <b>P1</b>                              | <b>a</b> | <b>b</b> | <b>c</b> | <b>d</b> |
|----------------------------------------|----------|----------|----------|----------|
| <b><math>\beta</math>-actin</b>        | 439      | 249      | 121      | 0        |
| <b><math>\alpha</math>A-crystallin</b> | 791      | 306      | 11       | 0        |
| <b><math>\beta</math>B1-crystallin</b> | 275      | 151      | 41       | 0        |
| <b><math>\gamma</math>A-crystallin</b> | 146      | 272      | 182      | 0        |

|                                        | <b>WT P1</b> | <b>Snf2h null P1</b> |
|----------------------------------------|--------------|----------------------|
| <b><math>\beta</math>-actin</b>        | 651          | 240                  |
| <b><math>\alpha</math>A-crystallin</b> | 909          | 315                  |
| <b><math>\beta</math>B1-crystallin</b> | 543          | 268                  |
| <b><math>\gamma</math>A-crystallin</b> | 555          | 235                  |

**Table. S3.** Table of standard deviations for transcription burst fraction measurements.

| <b>E12.5</b>                           | <b>a</b> | <b>b</b> | <b>c</b> | <b>d</b> |
|----------------------------------------|----------|----------|----------|----------|
| <b><math>\beta</math>-actin</b>        | 2.7882   | 2.9289   | 2.9236   | 3.2262   |
| <b><math>\alpha</math>A-crystallin</b> | 2.4722   | 2.5925   | 2.5358   | 2.4697   |
| <b><math>\beta</math>B1-crystallin</b> | 2.6075   | 3.6279   | 3.0261   | 2.5343   |
| <b><math>\gamma</math>A-crystallin</b> | 1.121    | 2.2824   | 2.7867   | 2.736    |

| <b>E14.5</b>                           | <b>a</b> | <b>b</b> | <b>c</b> | <b>d</b> |
|----------------------------------------|----------|----------|----------|----------|
| <b><math>\beta</math>-actin</b>        | 2.1847   | 4.2984   | 4.629    | 2.7256   |
| <b><math>\alpha</math>A-crystallin</b> | 2.1323   | 2.1575   | 2.6829   | 1.8326   |
| <b><math>\beta</math>B1-crystallin</b> | 2.6858   | 3.8106   | 4.5014   | 4.7104   |
| <b><math>\gamma</math>A-crystallin</b> | 1.3306   | 3.1414   | 3.7352   | 2.7256   |

| <b>E16.5</b>                           | <b>a</b> | <b>b</b> | <b>c</b> | <b>d</b> |
|----------------------------------------|----------|----------|----------|----------|
| <b><math>\beta</math>-actin</b>        | 2.7003   | 3.6358   | 3.8264   | 3.8217   |
| <b><math>\alpha</math>A-crystallin</b> | 2.0324   | 2.0283   | 2.2346   | 0.6192   |
| <b><math>\beta</math>B1-crystallin</b> | 2.5718   | 3.2439   | 3.7435   | 4.0658   |
| <b><math>\gamma</math>A-crystallin</b> | 1.8998   | 3.5347   | 4.1766   | 3.7829   |

| <b>P1</b>                              | <b>a</b> | <b>b</b> | <b>c</b> | <b>d</b> |
|----------------------------------------|----------|----------|----------|----------|
| <b><math>\beta</math>-actin</b>        | 1.7641   | 2.1979   | 2.717    | NA       |
| <b><math>\alpha</math>A-crystallin</b> | 1.4224   | 1.885    | 1.097    | NA       |
| <b><math>\beta</math>B1-crystallin</b> | 2.0262   | 2.713    | 2.8809   | NA       |
| <b><math>\gamma</math>A-crystallin</b> | 1.8854   | 2.6379   | 3.1792   | NA       |

|                                        | <b>WT P1</b> | <b>Snf2h null P1</b> |
|----------------------------------------|--------------|----------------------|
| <b><math>\beta</math>-actin</b>        | 1.3676       | 1.4698               |
| <b><math>\alpha</math>A-crystallin</b> | 1.7556       | 1.8734               |
| <b><math>\beta</math>B1-crystallin</b> | 1.5129       | 1.8816               |
| <b><math>\gamma</math>A-crystallin</b> | 2.22         | 1.5469               |

**Table. S4.** Table of standard deviations for transcription burst intensity measurements.

| <b>E12.5</b>                           | <b>a</b> | <b>b</b> | <b>c</b> | <b>d</b> |
|----------------------------------------|----------|----------|----------|----------|
| <b><math>\beta</math>-actin</b>        | 7.3733   | 3.6022   | 3.2183   | 2.5498   |
| <b><math>\alpha</math>A-crystallin</b> | 2.4522   | 1.6984   | 1.3836   | 1.7059   |
| <b><math>\beta</math>B1-crystallin</b> | 12.7818  | 6.5483   | 6.3446   | 8.2172   |
| <b><math>\gamma</math>A-crystallin</b> | 90.935   | 8.2466   | 15.6604  | 12.0328  |

| <b>E14.5</b>                           | <b>a</b> | <b>b</b> | <b>c</b> | <b>d</b> |
|----------------------------------------|----------|----------|----------|----------|
| <b><math>\beta</math>-actin</b>        | 12.9059  | 11.2358  | 10.152   | 7.4696   |
| <b><math>\alpha</math>A-crystallin</b> | 5.5745   | 7.8456   | 11.8615  | 4.0176   |
| <b><math>\beta</math>B1-crystallin</b> | 10.0917  | 12.8424  | 9.2171   | 10.4935  |
| <b><math>\gamma</math>A-crystallin</b> | 21.931   | 4.1301   | 3.9967   | 2.2957   |

| <b>E16.5</b>                           | <b>a</b> | <b>b</b> | <b>c</b> | <b>d</b> |
|----------------------------------------|----------|----------|----------|----------|
| <b><math>\beta</math>-actin</b>        | 2.0217   | 2.5324   | 3.8396   | 3.9512   |
| <b><math>\alpha</math>A-crystallin</b> | 1.3673   | 1.9192   | 3.4025   | 7.7329   |
| <b><math>\beta</math>B1-crystallin</b> | 3.8434   | 3.7089   | 2.9297   | 6.0089   |
| <b><math>\gamma</math>A-crystallin</b> | 6.8814   | 2.5694   | 2.4465   | 7.2049   |

| <b>P1</b>                              | <b>a</b> | <b>b</b> | <b>c</b> | <b>d</b> |
|----------------------------------------|----------|----------|----------|----------|
| <b><math>\beta</math>-actin</b>        | 1.2197   | 2.6165   | 5.7212   | NA       |
| <b><math>\alpha</math>A-crystallin</b> | 1.9589   | 3.6046   | 20.3828  | NA       |
| <b><math>\beta</math>B1-crystallin</b> | 1.3478   | 2.283    | 6.8795   | NA       |
| <b><math>\gamma</math>A-crystallin</b> | 4.0081   | 2.4814   | 3.5708   | NA       |

|                                        | <b>WT P1</b> | <b>Snf2h null P1</b> |
|----------------------------------------|--------------|----------------------|
| <b><math>\beta</math>-actin</b>        | 1.4502       | 2.5658               |
| <b><math>\alpha</math>A-crystallin</b> | 1.0032       | 2.858                |
| <b><math>\beta</math>B1-crystallin</b> | 1.8053       | 3.5122               |
| <b><math>\gamma</math>A-crystallin</b> | 1.5066       | 3.506                |
